# Supplementary material for: Duration of Antiplatelet Therapy Following Transcatheter Aortic Valve Replacement: Systematic Review and Network Meta‐Analysis
Source: PubMed Central journal article supplement — J Am Heart Assoc. 2021 Apr 17;10(9):e019490. doi: 10.1161/JAHA.120.019490 (PMC8200731; doi:10.1161/jaha.120.019490), 2021-04-17

# **SUPPLEMENTAL MATERIAL**

**Table S1. Variables used for propensity-score matching.**

---

| Author                | Year | Variables used for propensity-score matching                                                                                                                  |
|-----------------------|------|---------------------------------------------------------------------------------------------------------------------------------------------------------------|
| Ichibori et al. [26]  | 2017 | Age, sex, New York Heart Association classification, previous percutaneous coronary intervention, estimated glomerular filtration rate and aortic valve area. |
| D'Ascenzo et al. [27] | 2017 | Pre-treatment covariates.                                                                                                                                     |

**Table S2. Quality assessment of observational studies based on NOS (range, 1-9). NOS score $\geq$ 8 is low risk, 6-7 is moderate risk and  $\leq$ 5 is high risk.**

| Studies                 | Representativeness of exposed cohort | Selection of nonexposed cohort | Ascertainment of exposure | Absence of outcome at start of study | Comparability of cohorts | Outcome assessment | Length of follow-up | Adequacy of follow-up | NOS score |
|-------------------------|--------------------------------------|--------------------------------|---------------------------|--------------------------------------|--------------------------|--------------------|---------------------|-----------------------|-----------|
| Poliacikova et al. [28] | 1                                    | 1                              | 1                         | 1                                    | 1                        | 1                  | 1                   | 1                     | 8         |
| Ichibori et al. [26]    | 1                                    | 1                              | 0                         | 1                                    | 2                        | 0                  | 1                   | 1                     | 8         |
| D'Ascenzo et al. [27]   | 1                                    | 0                              | 1                         | 1                                    | 2                        | 1                  | 1                   | 1                     | 8         |

NOS=Newcastle-Ottawa Scale.

**Figure S1. Search term.**

| EMBASE                   |    |                                          |        |          |                                 |                        |
|--------------------------|----|------------------------------------------|--------|----------|---------------------------------|------------------------|
| <input type="checkbox"/> | 1  | transcatheter aortic valve implantation/ | 22597  | Advanced | <a href="#">Display Results</a> | <a href="#">More ▾</a> |
| <input type="checkbox"/> | 2  | dual antiplatelet therapy/               | 7225   | Advanced | <a href="#">Display Results</a> | <a href="#">More ▾</a> |
| <input type="checkbox"/> | 3  | antiplatelet.mp.                         | 49979  | Advanced | <a href="#">Display Results</a> | <a href="#">More ▾</a> |
| <input type="checkbox"/> | 4  | clopidogrel/ or clopidogrel.mp.          | 63144  | Advanced | <a href="#">Display Results</a> | <a href="#">More ▾</a> |
| <input type="checkbox"/> | 5  | aspirin.mp. or acetylsalicylic acid/     | 228602 | Advanced | <a href="#">Display Results</a> | <a href="#">More ▾</a> |
| <input type="checkbox"/> | 6  | acetylsalicylic acid plus clopidogrel/   | 950    | Advanced | <a href="#">Display Results</a> | <a href="#">More ▾</a> |
| <input type="checkbox"/> | 7  | 2 or 3 or 4 or 5 or 6                    | 268230 | Advanced | <a href="#">Display Results</a> | <a href="#">More ▾</a> |
| <input type="checkbox"/> | 8  | TAVI.mp.                                 | 10584  | Advanced | <a href="#">Display Results</a> | <a href="#">More ▾</a> |
| <input type="checkbox"/> | 9  | TAVR.mp.                                 | 7727   | Advanced | <a href="#">Display Results</a> | <a href="#">More ▾</a> |
| <input type="checkbox"/> | 10 | 1 or 8 or 9                              | 24792  | Advanced | <a href="#">Display Results</a> | <a href="#">More ▾</a> |
| <input type="checkbox"/> | 11 | 7 and 10                                 | 1192   | Advanced | <a href="#">Display Results</a> | <a href="#">More ▾</a> |

**Cochrane Central Register of Controlled Trials**

**91** Trials matching **(transcatheter aortic valve) AND (antiplatelet OR antithrombotic OR aspirin or clopidogrel) in Title Abstract Keyword**

[Cochrane Central Register of Controlled Trials](#)

**Pubmed**

**(transcatheter aortic valve) and (replacement or implant or implantation) and (antiplatelet or antithrombotic or aspirin or clopidogrel)**

**Figure S2. Risk of bias summary according to the Cochrane Collaboration Manual.**

**Yellow: unclear risk; Green: low risk (A) and risk of bias graph according to the Cochrane Collaboration Manual (B).**

A

|                  | Random sequence generation (selection bias) | Allocation concealment (selection bias) | Blinding of participants and personnel (performance bias) | Blinding of outcome assessment (detection bias) | Incomplete outcome data (attrition bias) | Selective reporting (reporting bias) |
|------------------|---------------------------------------------|-----------------------------------------|-----------------------------------------------------------|-------------------------------------------------|------------------------------------------|--------------------------------------|
| 2011 Ussia       | ?                                           | -                                       | +                                                         | +                                               | +                                        | +                                    |
| 2014 Stabile     | ?                                           | -                                       | +                                                         | ?                                               | +                                        | +                                    |
| 2017 Rodes-Cabau | ?                                           | -                                       | +                                                         | ?                                               | +                                        | +                                    |
| 2020 Brouwer     | +                                           | -                                       | +                                                         | ?                                               | +                                        | +                                    |

B

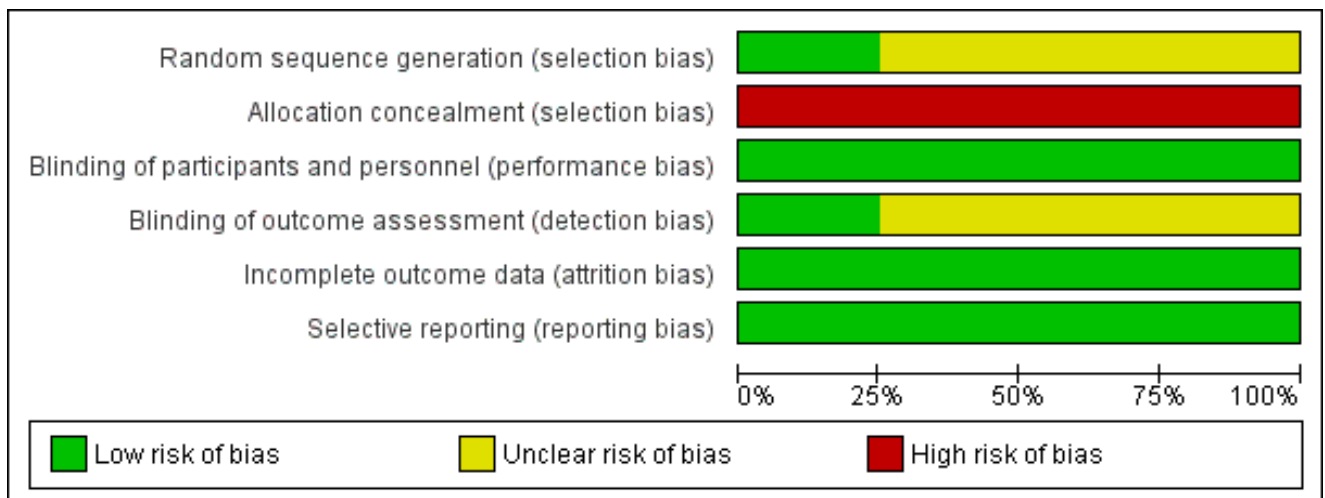

**Figure S3. Antiplatelet therapy and risk of major or life-threatening bleeding (random-effects model) of sensitivity analysis including only 4 randomized controlled trials.**

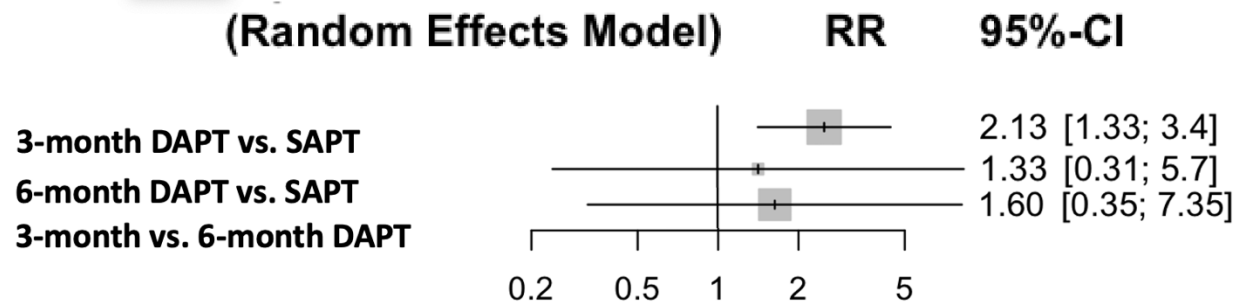

CI=confidence interval, DAPT=dual antiplatelet therapy, RR=risk ratio, SAPT=single antiplatelet therapy.

**Figure S4. Antiplatelet therapy and risk of stroke (random-effects model) of sensitivity analysis including only 4 randomized controlled trials.**

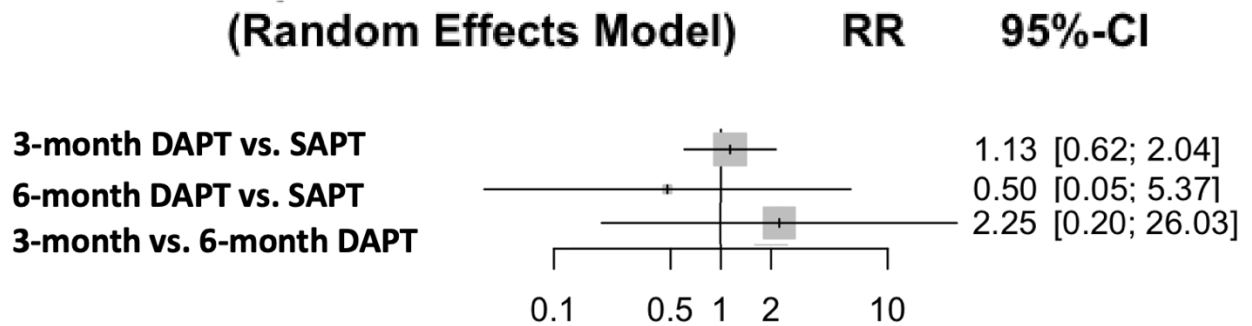

CI=confidence interval, DAPT=dual antiplatelet therapy, RR=risk ratio, SAPT=single antiplatelet therapy.

**Figure S5. Antiplatelet therapy and risk of all-cause mortality (random-effects model) of sensitivity analysis including only 4 randomized controlled trials.**

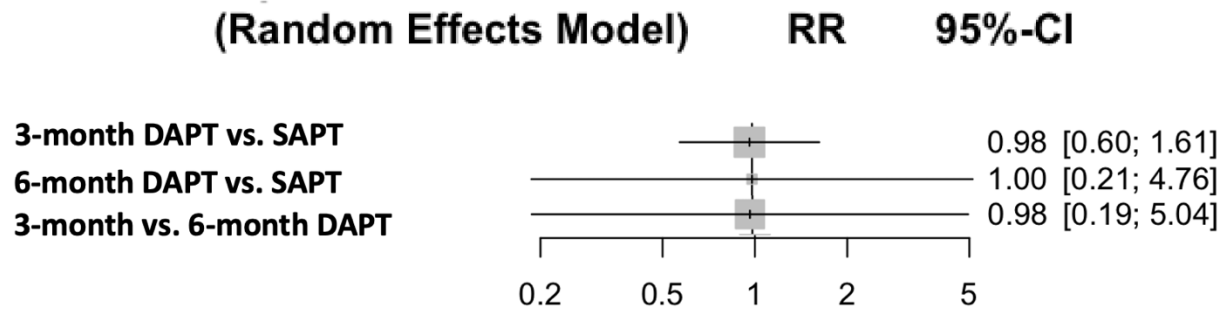

CI=confidence interval, DAPT=dual antiplatelet therapy, RR=risk ratio, SAPT=single antiplatelet therapy



**Figure S6. Funnel plot for each analysis.** A: Major or life-threatening bleeding; B: Stroke; C: All-cause mortality; D: Major or life-threatening bleeding (sensitivity analysis); B: Stroke (sensitivity analysis); C: All-cause mortality (sensitivity analysis).

A

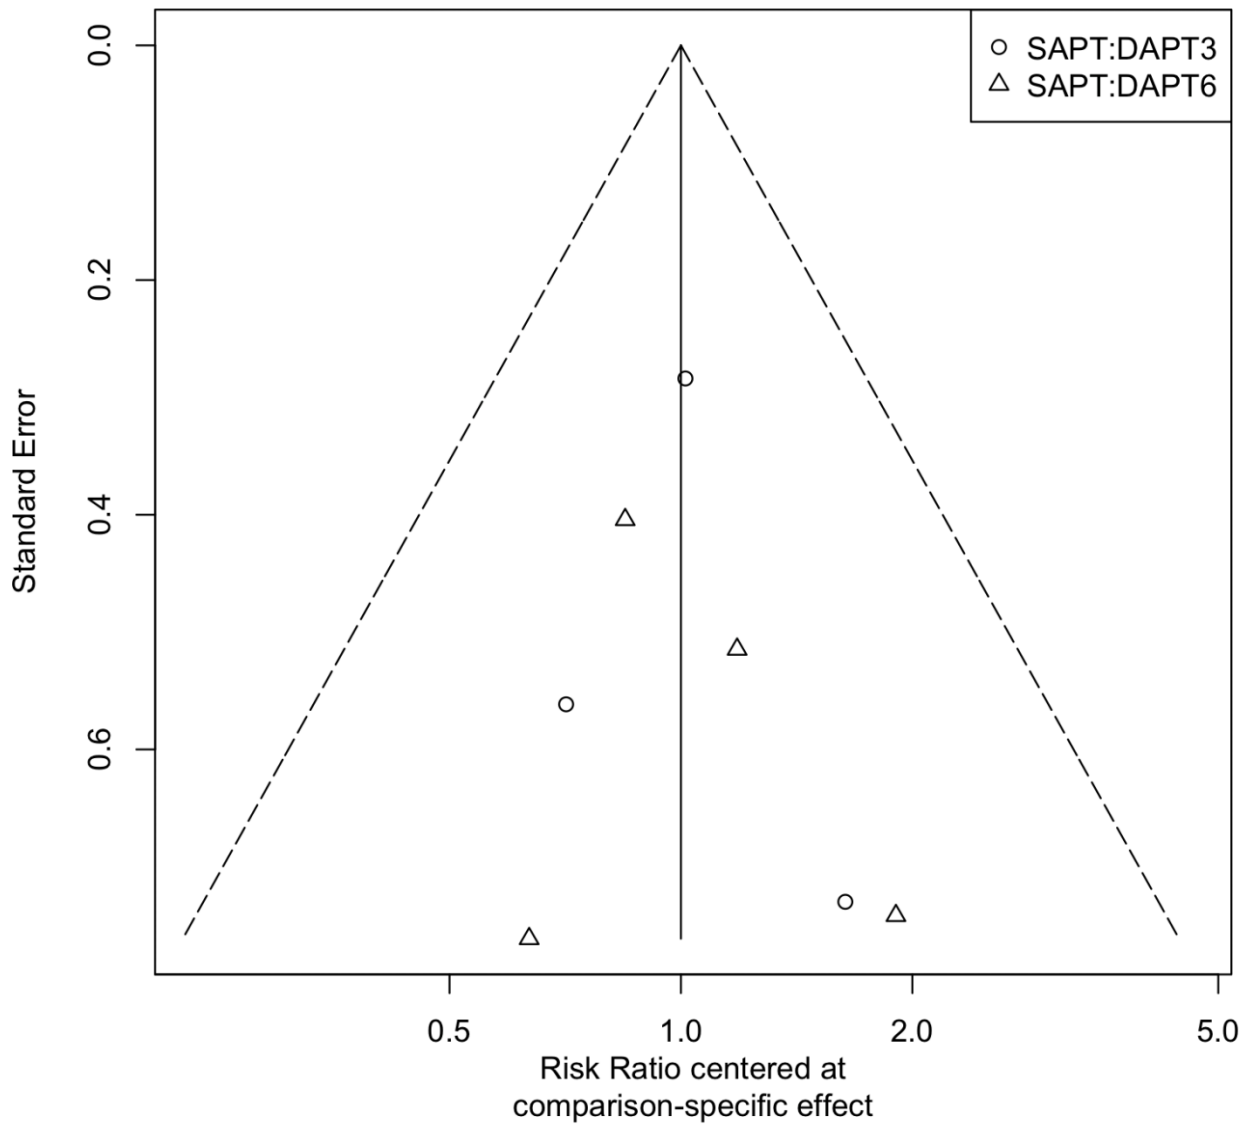

B

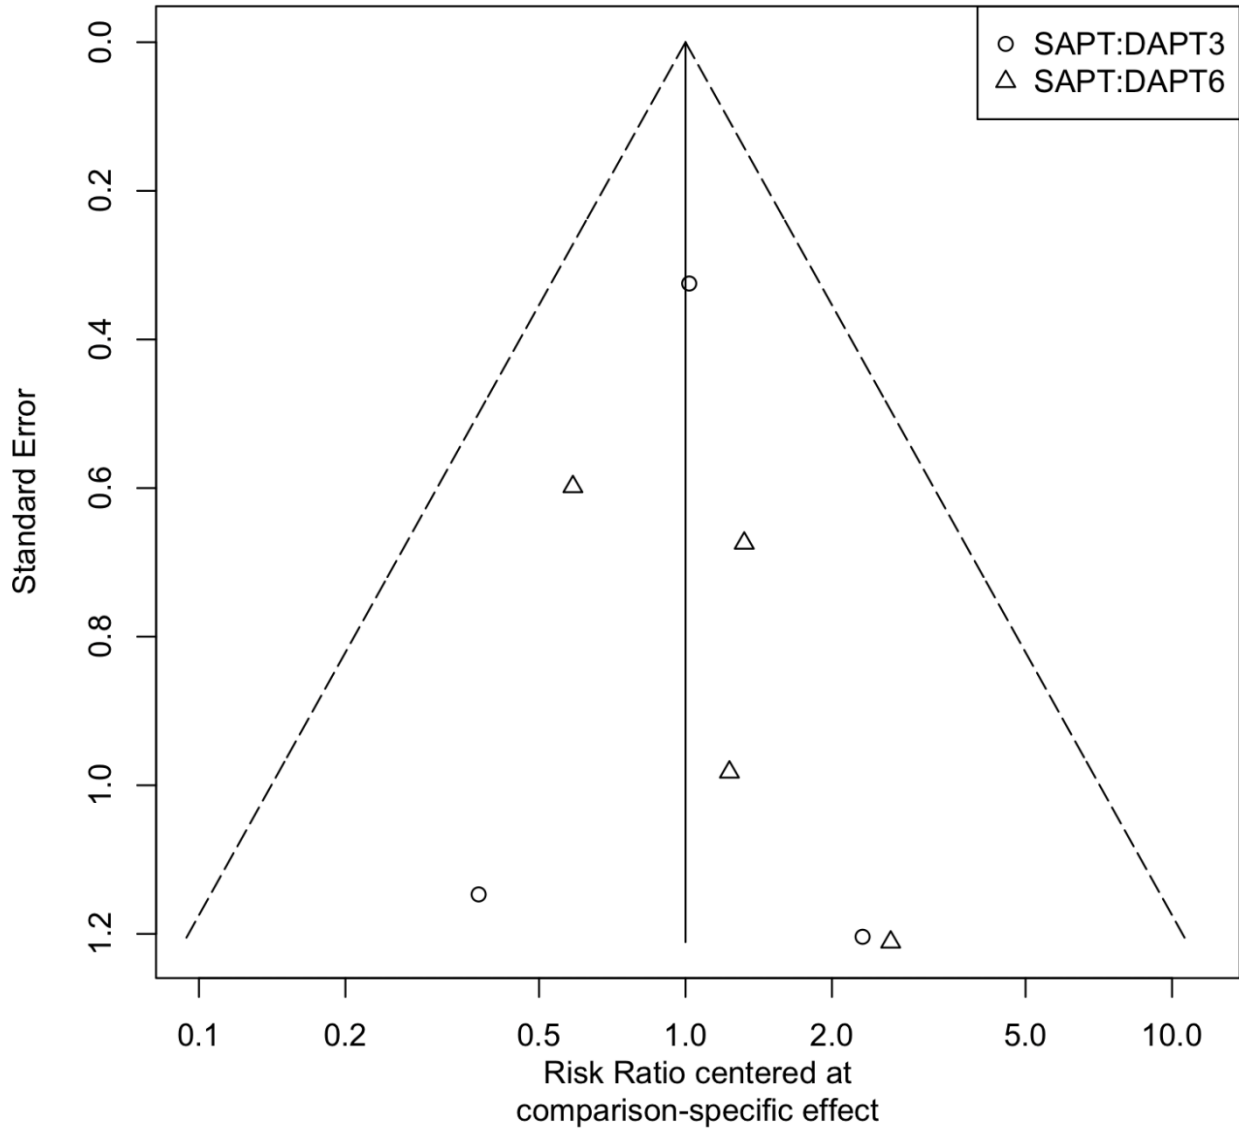

C

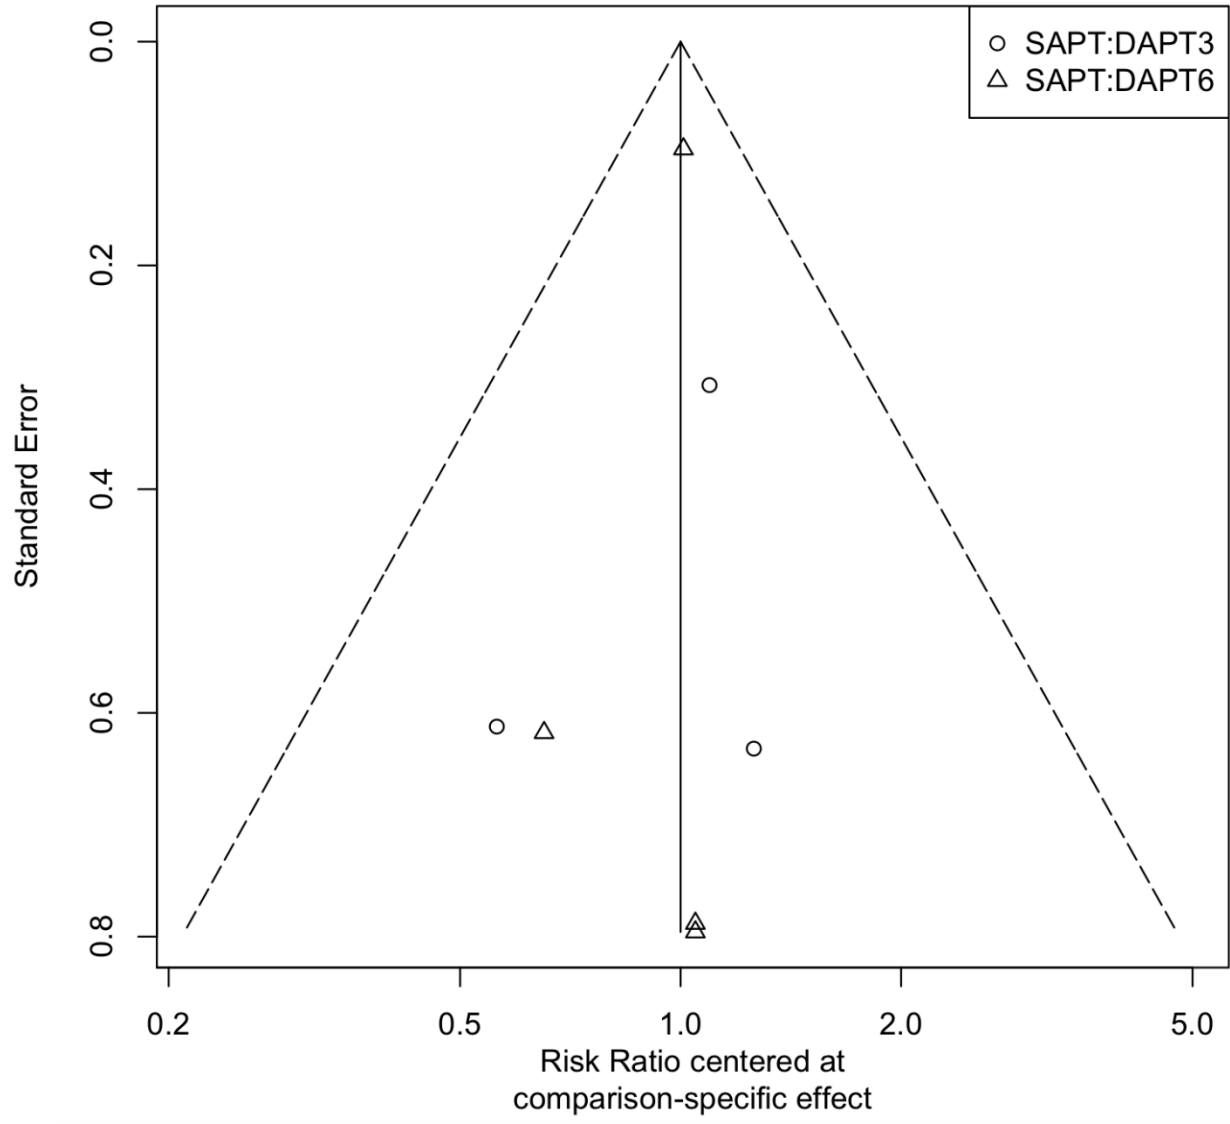

D

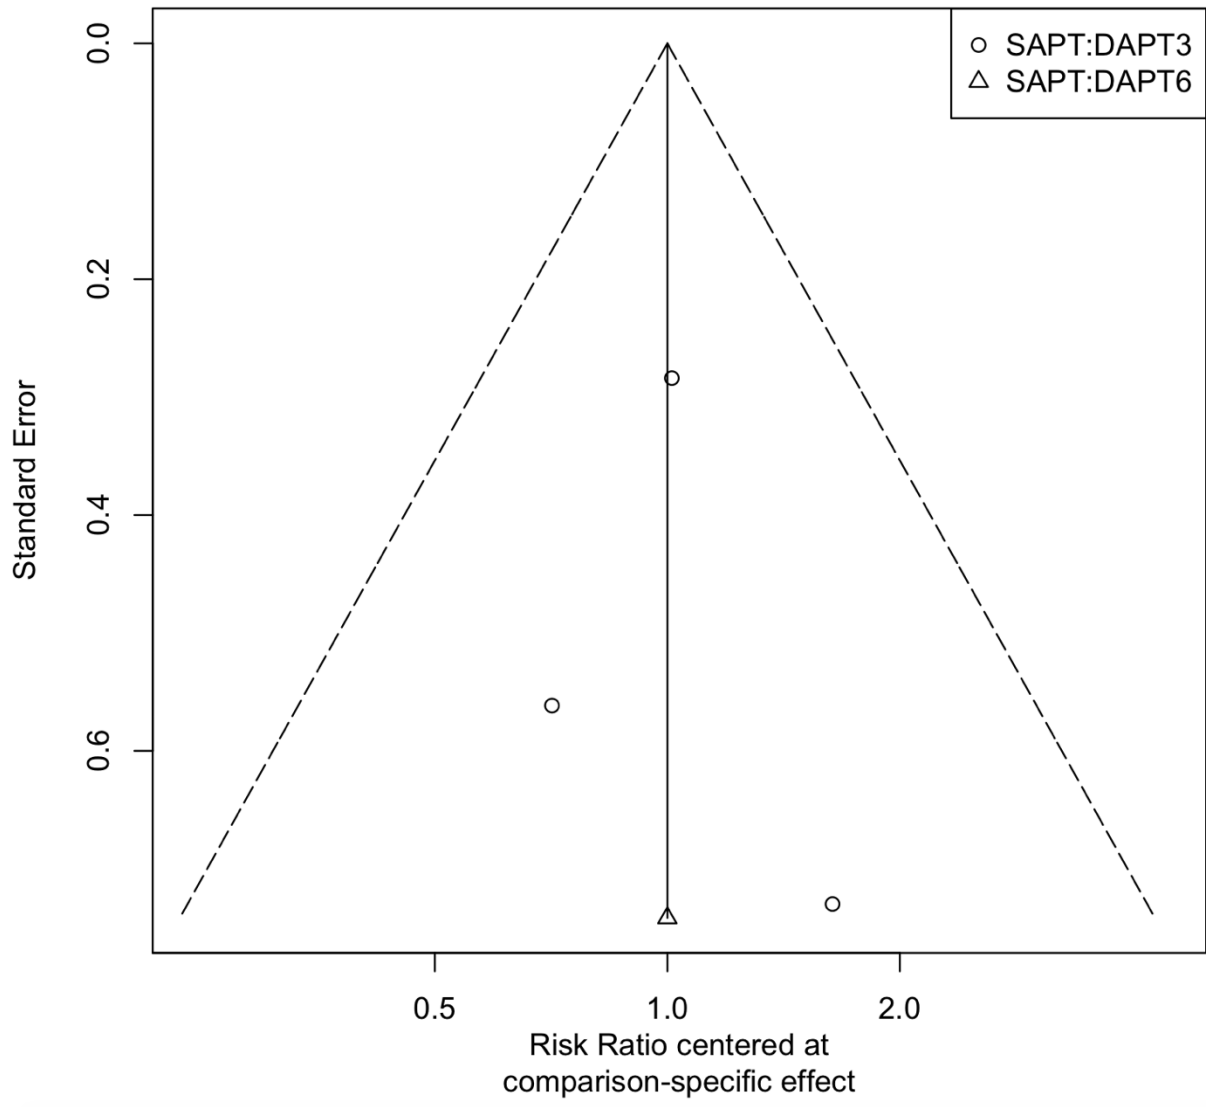

E

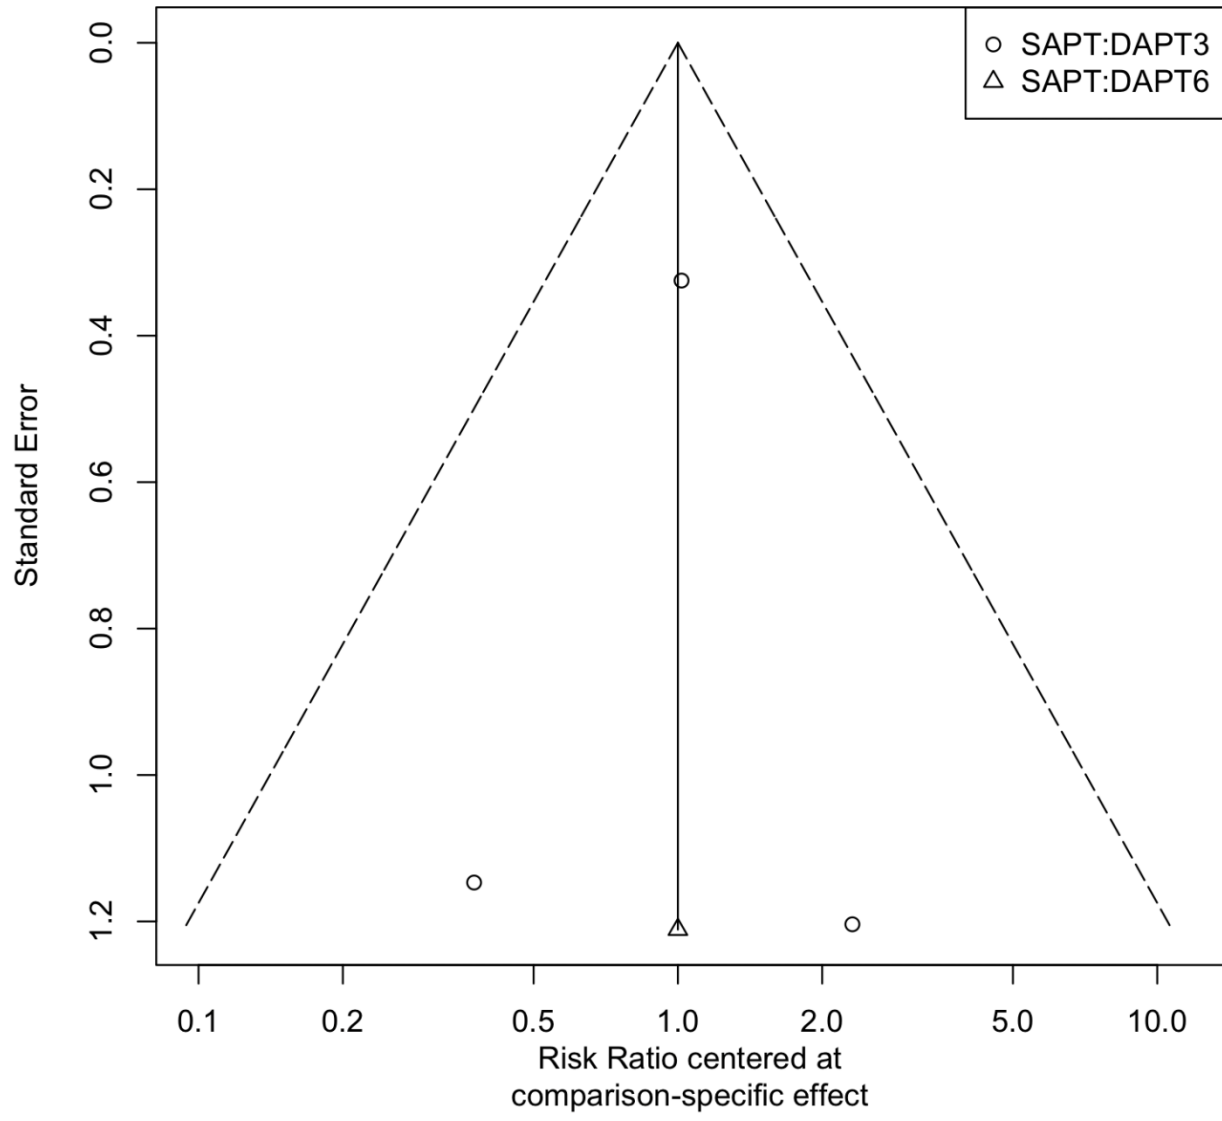

F

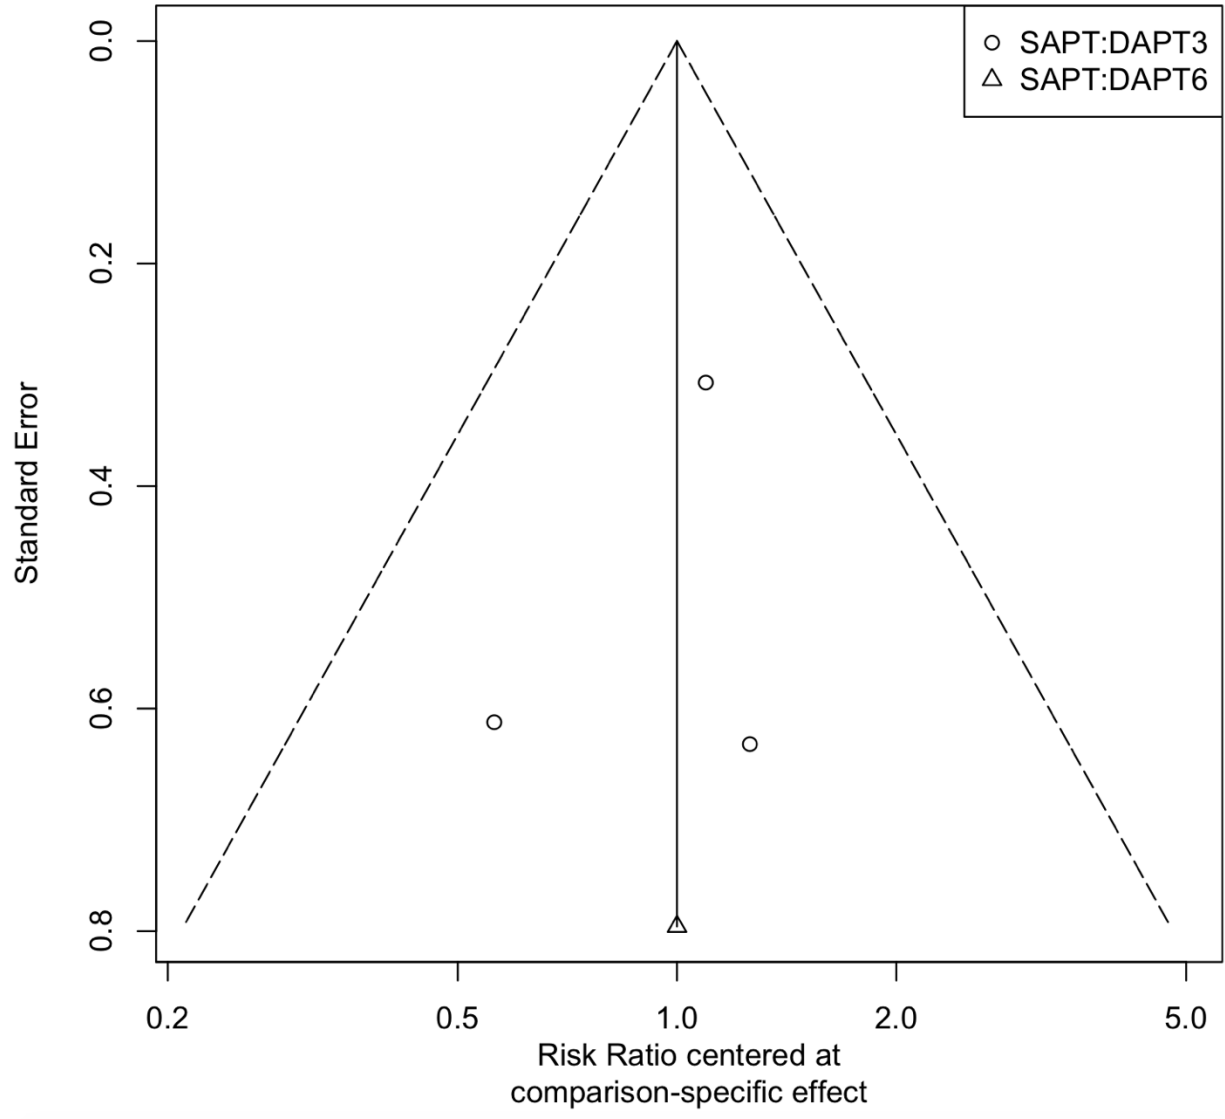

Supplement: JAH3-10-e019490-s001.pdf [file JAH3-10-e019490-s001.pdf]
